# Supplementary material
Source: Springer Nature journal article supplement (https://www.springermedizin.de/resource/supplementary/12879_2012_3034_MOESM4_ESM.pdf/9446510)

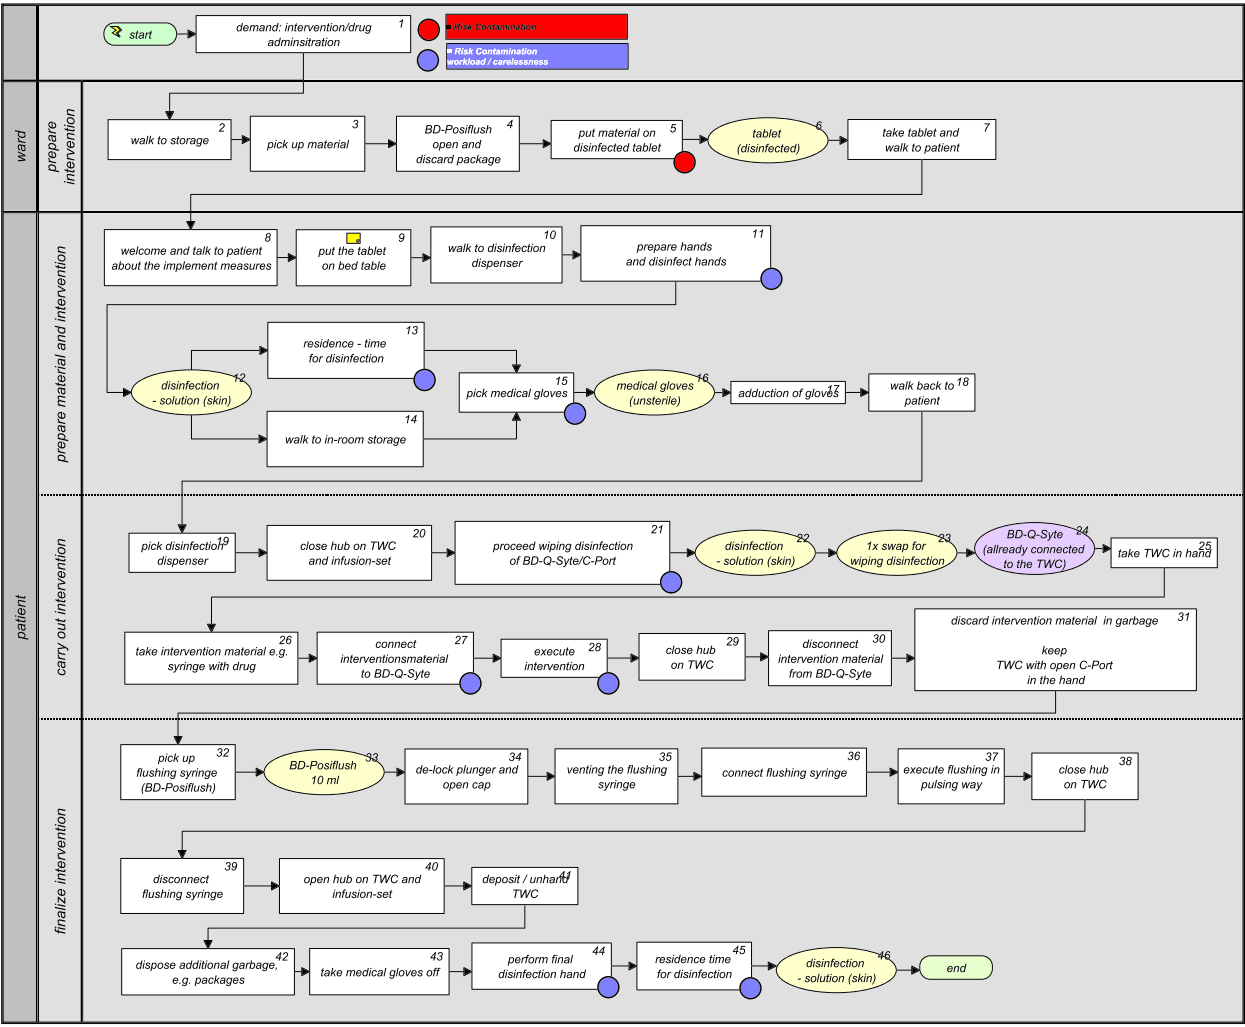

Symbolism:

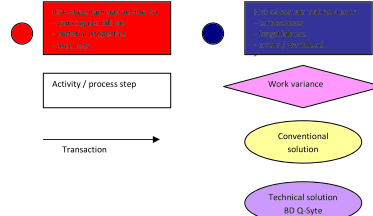

Supplement: MOESM4 [file 9446510]
